# Supplementary material for: Morphogenetic degeneracies in the actomyosin cortex
Source: eLife. 2018 Oct 22;7:e37677. doi: 10.7554/eLife.37677 (PMC6226289; doi:10.7554/eLife.37677)
Supplement: Supplementary file 1. — ABPs and suppressor proteins that were tested as well as those that were discarded are compiled. Common names of the proteins, their orthologous C. elegans gene names, putative functions, number of hours of RNAi and the number of biological replicates performed for each knockdown are indicated. Star indicates ABPs that were also picked up in the suppressor screen previously performed in the Ahringer lab. [file elife-37677-supp1.xlsx]

## Sheet: Sheet1
	Common name	C. elegans ortholog	Putative actomyosin-related function	Number of hrs of RNAi	Number of biological replicates
	Negative control
	Kinesin-like protein 1	klp-1	--	40	9
	Actin binding proteins tested
1	Adducin	add-1	Crosslinks F-actin	40	5
2	Adducin	add-2	Crosslinks F-actin	40	6
3	Anillin	ani-1	Crosslinks F-actin, myosin and membrane	40	6
4	Arp2/3 complex component	arx-1	Nucleates branched filaments	40	6
5	Arp2/3 complex component	arx-2	Nucleates branched filaments	40	6
6	Actinin	atn-1	Crosslinks F-actin	40	6
7	Capping protein	cap-1	Caps plus ends of F-actin	30	7
8	Adenylyl cyclase associated protein	cas-1	Sequesters actin monomers	40	4
9	Coronin	cor-1	Crosslinks F-actin	40	4
10	Calponin	cpn-1	Regulates interaction between F-actin and myosin	40	7
11	Calponin	cpn-2	Regulates interaction between F-actin and myosin	40	6
12	Calponin	cpn-3	Regulates interaction between F-actin and myosin	40	6
13	Formin	cyk-1	Nucleates linear unbranched actin filaments	30	7
14	Dystroglycan	dgn-1	Transmembrane protein that bundles actin filaments	40	7
15	Dystroglycan	dgn-2	Transmembrane protein that bundles actin filaments	40	6
16	Dystroglycan	dgn-3	Transmembrane protein that bundles actin filaments	40	8
17	Ezrin-radixin-moesin*	erm-1	Crosslinks F-actin to membrane	40	11
18	Formin family protein	fhod-1	Nucleates linear unbranched actin filaments	40	6
19	Flightless homolog	fli-1	Severs F-actin (gelsolin family protein)	40	9
20	Filamin	fln-1	Crosslinks F-actin	40	6
21	Annexin	nex-1	Crosslinks F-actin to membrane	40	7
22	Annexin	nex-2	Crosslinks F-actin to membrane	40	7
23	Annexin	nex-3	Crosslinks F-actin to membrane	40	6
24	Annexin	nex-4	Crosslinks F-actin to membrane	40	6
25	Profilin	pfn-1	Sequesters actin monomers and promotes formin-mediated polymerization	20	6
26	Plastin*	plst-1	Bundles F-actin	40	6
27	Spectrin	spc-1	Crosslinks F-actin	40	6
28	Tropomyosin	tmy-1	Regulates interaction between F-actin and myosin	40	5
29	Tetra thymosin	tth-1	Sequesters actin monomers	40	5
30	Septin*	unc-59	Crosslinks F-actin to membrane	40	7
31	Cofilin	unc-60	Severs F-actin	15	8
32	Villin	viln-1	Severs F-actin (gelsolin family protein)	40	7
33	Zyxin	zyx-1	Mechanosensitive protein that binds F-actin	40	6
	Suppressor proteins tested
1	Rho GTPase	cdc-42	Regulates actin dynamics and localization of PAR proteins	40	5
2	Centaurin	cnt-2	Arf GTPase activating protein - Regulates actin dynamics	40	4
3	Casein kinase 1	csnk-1	Regulates chiral properties of the cytoskeleton	40	15
4	GLC7 like phosphatase	gsp-1	Unknown	40	4
5	No pseudocleavage protein	nop-1	Regulates actin dynamics	40	5
6	Nuclear pore complex protein	npp-2	Unknown	40	4
7	NOT-like protein	ntl-2	Unknown	40	5
8	Rho GTPase activating protein	rga-3	Regulates actin dynamics	40	15
9	PIP phosphatase homolog	sac-1	Unknown	40	5
10	Uncoordinated-45	unc-45	Regulates myosin folding and assembly into thick filaments	40	6
11	Y54H5A.2	Y54H5A.2	Unknown	40	4
	Actin binding proteins not tested
1	Afadin	afd-1	Component of cell-cell adhesion complex	--	--
2	Abnormal nuclear anchorage	anc-1	Binds to nuclear actin	--	--
3	Anillin	ani-2	Crosslinks F-actin, myosin and membrane	--	--
4	Anillin	ani-3	Crosslinks F-actin, myosin and membrane	--	--
5	Arp2/3 complex component	arx-3	Nucleates branched filaments	--	--
6	Arp2/3 complex component	arx-4	Nucleates branched filaments	--	--
7	Arp2/3 complex component	arx-5	Nucleates branched filaments	--	--
8	Arp2/3 complex component	arx-6	Nucleates branched filaments	--	--
9	Arp2/3 complex component	arx-7	Nucleates branched filaments	--	--
10	Beta-catenin	bar-1	Actin binding protein at adherens junctions	--	--
11	Beta-G-spectrin	bgs-1	Spectrin-like protein found in cell-cell contacts	--	--
12	Capping protein	cap-2	Caps plus ends of F-actin	--	--
13	Calponin	cpn-4	Regulates interaction between F-actin and myosin	--	--
14	Catenin	ctn-1	Actin binding protein at adherens junctions	--	--
15	Rho-GAP	cyk-4	GTPase activating protein that inactivates Rho function	--	--
16	Vinculin	deb-1	Actin binding protein at adherens junctions	--	--
17	Dystrophin	dys-1	Crosslinks F-actin to membrane in muscle and nerve cells	--	--
18	Epsin	epn-1	Bundles F-actin	--	--
19	Formin family protein	fhod-2	Nucleates linear unbranched actin filaments	--	--
20	Filamin	fln-2	Crosslinks F-actin	--	--
21	Zinc finger protein	fozi-1	Transcription regulator; Contains a vestigial formin homology domain	--	--
22	Fascin	frg-1	Binds to beta-catenin; component of adherens junctions	--	--
23	Formin related protein	frl-1	Function unknown	--	--
24	FERM domain family protein	frm-1	Belongs to ERM family proteins; Function unknown	--	--
25	Germinal center kinase	gck-1	Homologous to human lim-kinases that bind to F-actin and phosphorylate cofilin	--	--
26	Gelsolin	gsnl-1	Severs F-actin	--	--
27	Glycogenin	gyg-1	Glycogen synthesis primer; Binds to F-actin	--	--
28	Huntingtin-interacting protein	hipr-1	Functions in actin-clathrin coupling; Mainly expressed in neurons	--	--
29	Histidine rich membrane protein	hke-4.1	Histidine rich proteins are known to bind F-actin in a pH sensitive manner	--	--
30	Histidine rich membrane protein	hke-4.2	Histidine rich proteins are known to bind F-actin in a pH sensitive manner	--	--
31	Alpha-catenin	hmp-1	Actin binding protein at adherens junctions	--	--
32	Beta-catenin	hmp-2	Actin binding protein at adherens junctions	--	--
33	Presenilin	hop-1	Transmembrane protein that binds to F-actin in neurons	--	--
34	Inverted formin	inft-1	Formin-3 related protein	--	--
35	Inverted formin	inft-2	Formin-3 related protein	--	--
36	Kettin	ketn-1	Binds F-actin in muscles	--	--
37	Neurabin	nab-1	Neuron-specific F-actin binding protein	--	--
38	Nuclear division cycle protein	ndc-80	Binds F-actin; Required for chromosome segregation	--	--
39	Profilin	pfn-2	Sequesters actin monomers and promotes formin-mediated polymerization	--	--
40	Profilin	pfn-3	Sequesters actin monomers and promotes formin-mediated polymerization	--	--
41	Protein kinase C	pkc-1	Regulates several actin binding proteins and can also directly bind F-actin	--	--
42	Protein kinase C	pkc-2	Regulates several actin binding proteins and can also directly bind F-actin	--	--
43	Protein kinase C	pkc-3	Regulates several actin binding proteins and can also directly bind F-actin	--	--
44	Coronin-like protein	pod-1	Function unknown but likely to crosslink F-actin	--	--
45	PIP kinase	ppk-1	Involved in synthesis of PIP lipids; Known to bind F-actin	--	--
46	PIP kinase	ppk-2	Involved in synthesis of PIP lipids; Known to bind F-actin	--	--
47	PIP kinase	ppk-3	Involved in synthesis of PIP lipids; Known to bind F-actin	--	--
48	Presenilin	sel-12	Transmembrane protein that binds to F-actin in neurons	--	--
49	Beta-H-spectrin	sma-1	Spectrin-like protein	--	--
50	Presenilin	spe-4	Transmembrane protein that binds to F-actin in neurons	--	--
51	Tropomodulin	tmd-1	Binds F-actin in muscles	--	--
52	Titin	ttn-1	Binds F-actin in muscles	--	--
53	Zinc finger protein	unc-115	Binds F-actin in neurons	--	--
54	Neuron navigator protein	unc-53	Binds F-actin in neurons	--	--
55	Actin interacting protein	unc-78	Increases actin filament disassembly in presence of cofilin in myofibrils	--	--
56	Calponin-like proteins	unc-87	Required for maintenance of myofilament structure in body wall muscles	--	--
57	Spectraplakins	vab-10	Crosslinks F-actin; Binds actin, tubulin and intermediate filament systems	--	--
58	WASP interacting protein	wip-1	Activates Arp2/3 complex	--	--
59	Beta-catenin	wrm-1	Actin binding protein at adherens junctions	--	--
60	WASP family protein	wsp-1	Activates Arp2/3 complex	--	--
61	WASP family protein	wve-1	Activates Arp2/3 complex	--	--
62	Talin	tln-1	Binds F-actin in focal adhesions	--	--
