# Supplementary figures and images for: Morphogenetic degeneracies in the actomyosin cortex
Source: eLife journal article supplement (doi:10.7554/elife.37677), 2018-10-22

Frequency

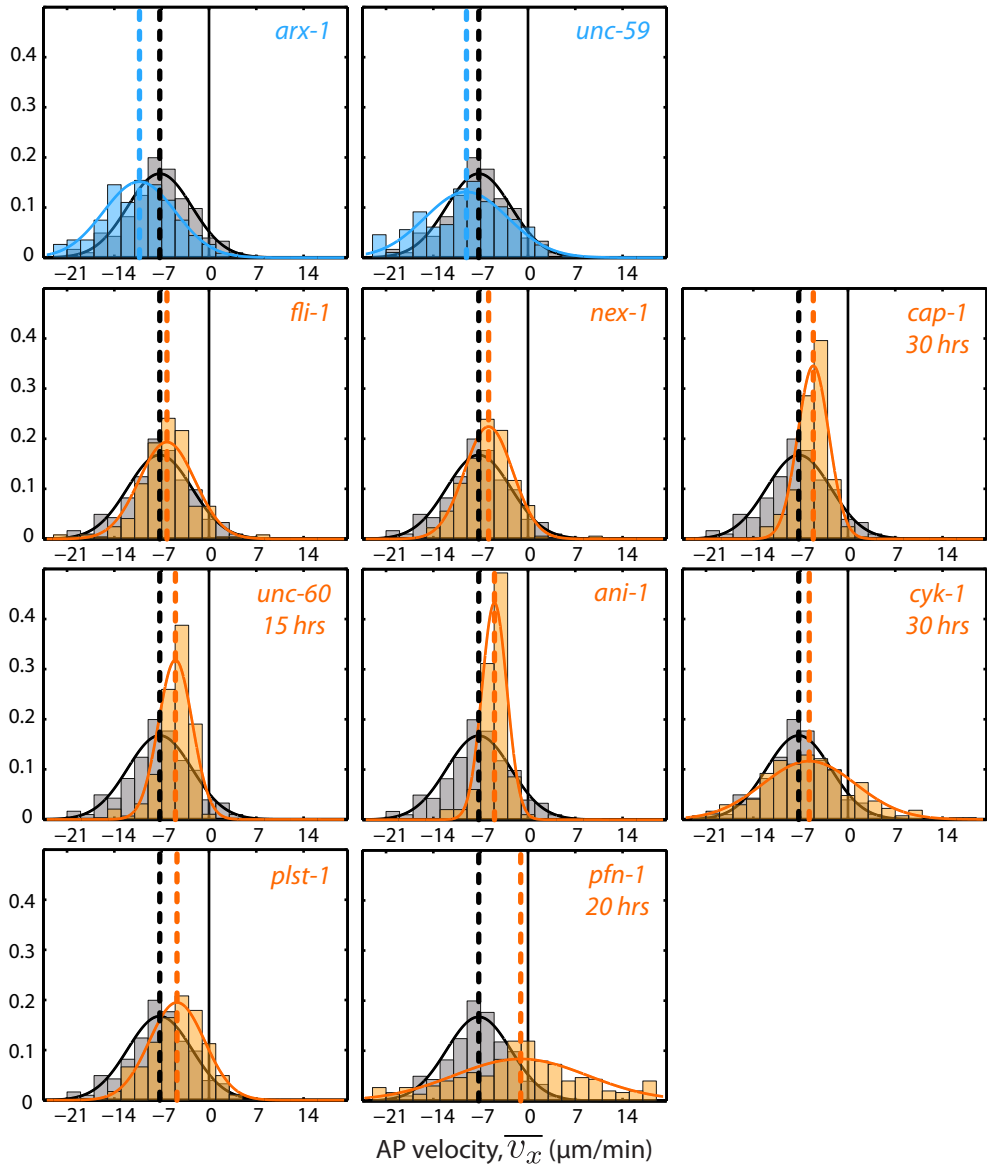

Supplement: supp [file elife-37677-supp-v1.zip]

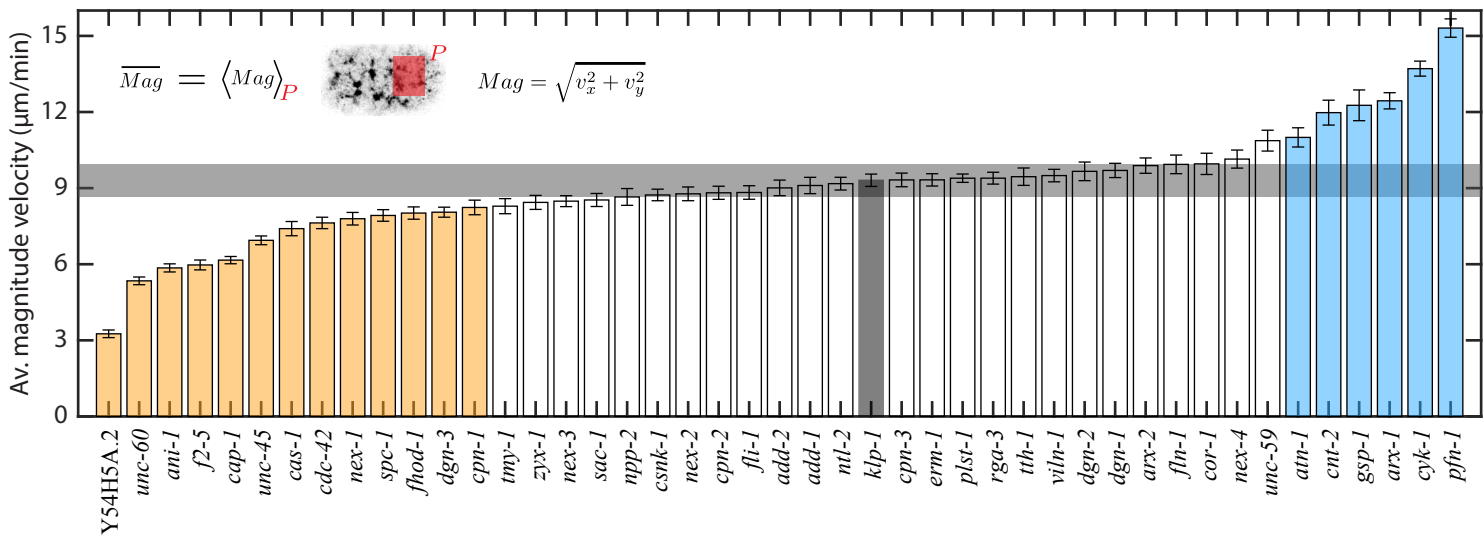

Supplement: supp [file elife-37677-supp-v1.zip]

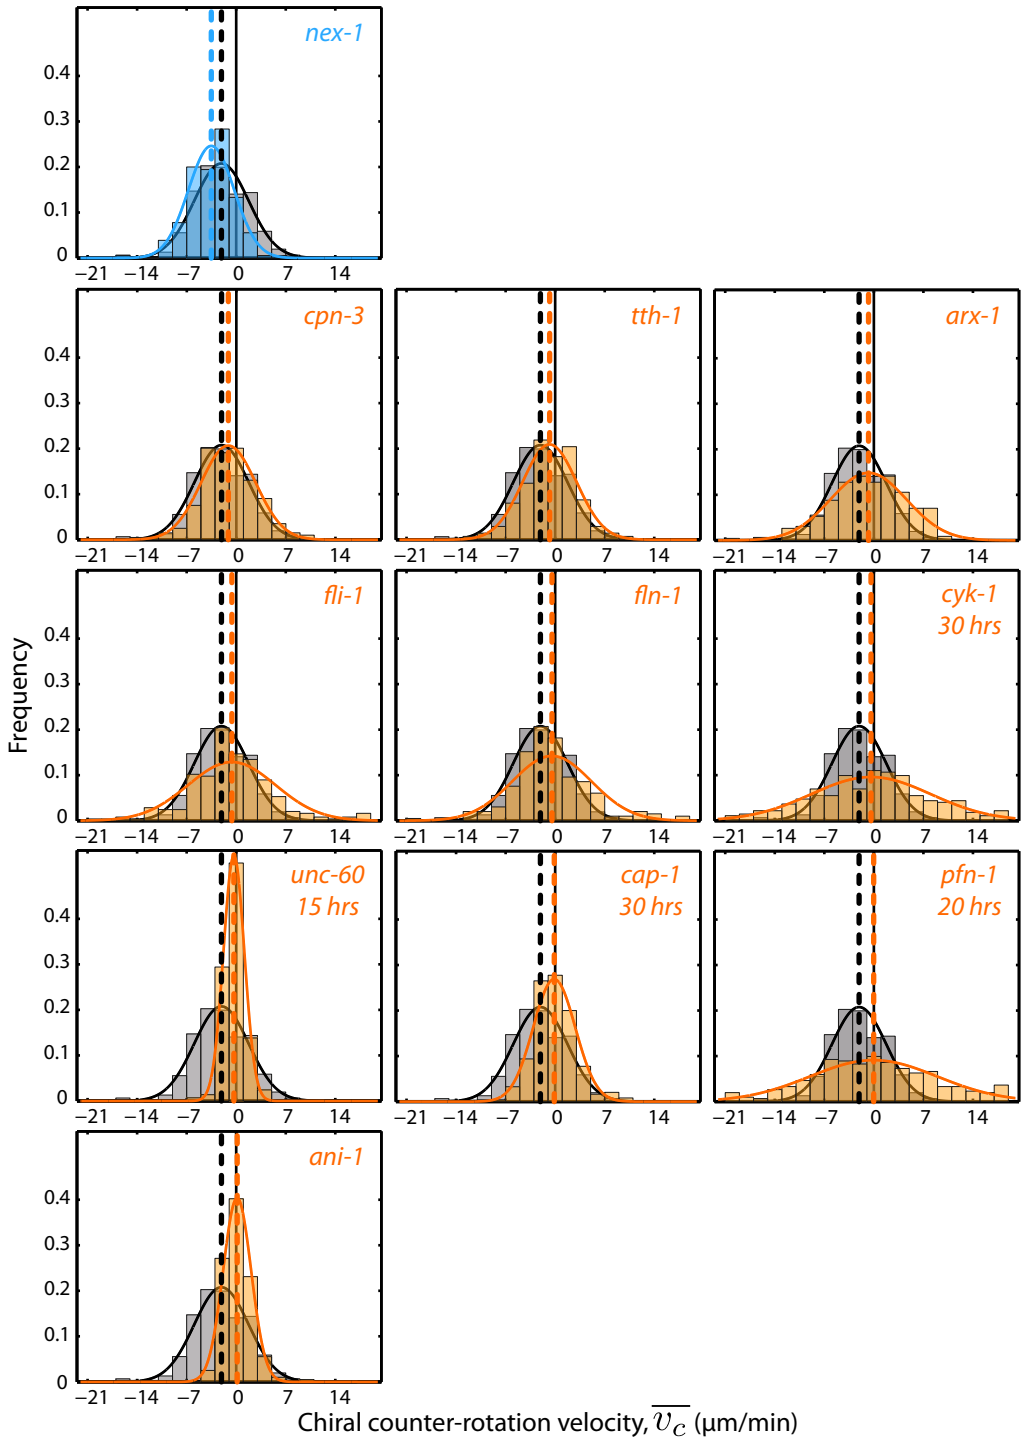

Supplement: supp [file elife-37677-supp-v1.zip]

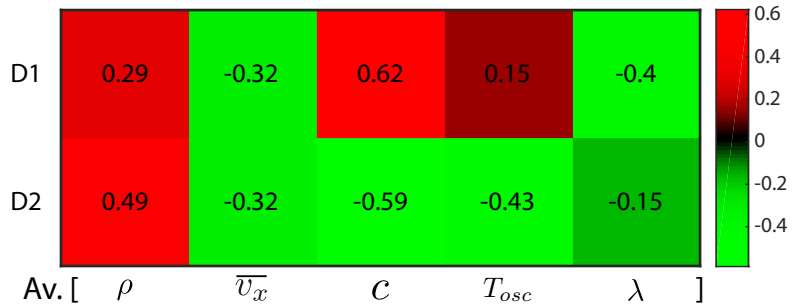

Supplement: supp [file elife-37677-supp-v1.zip]

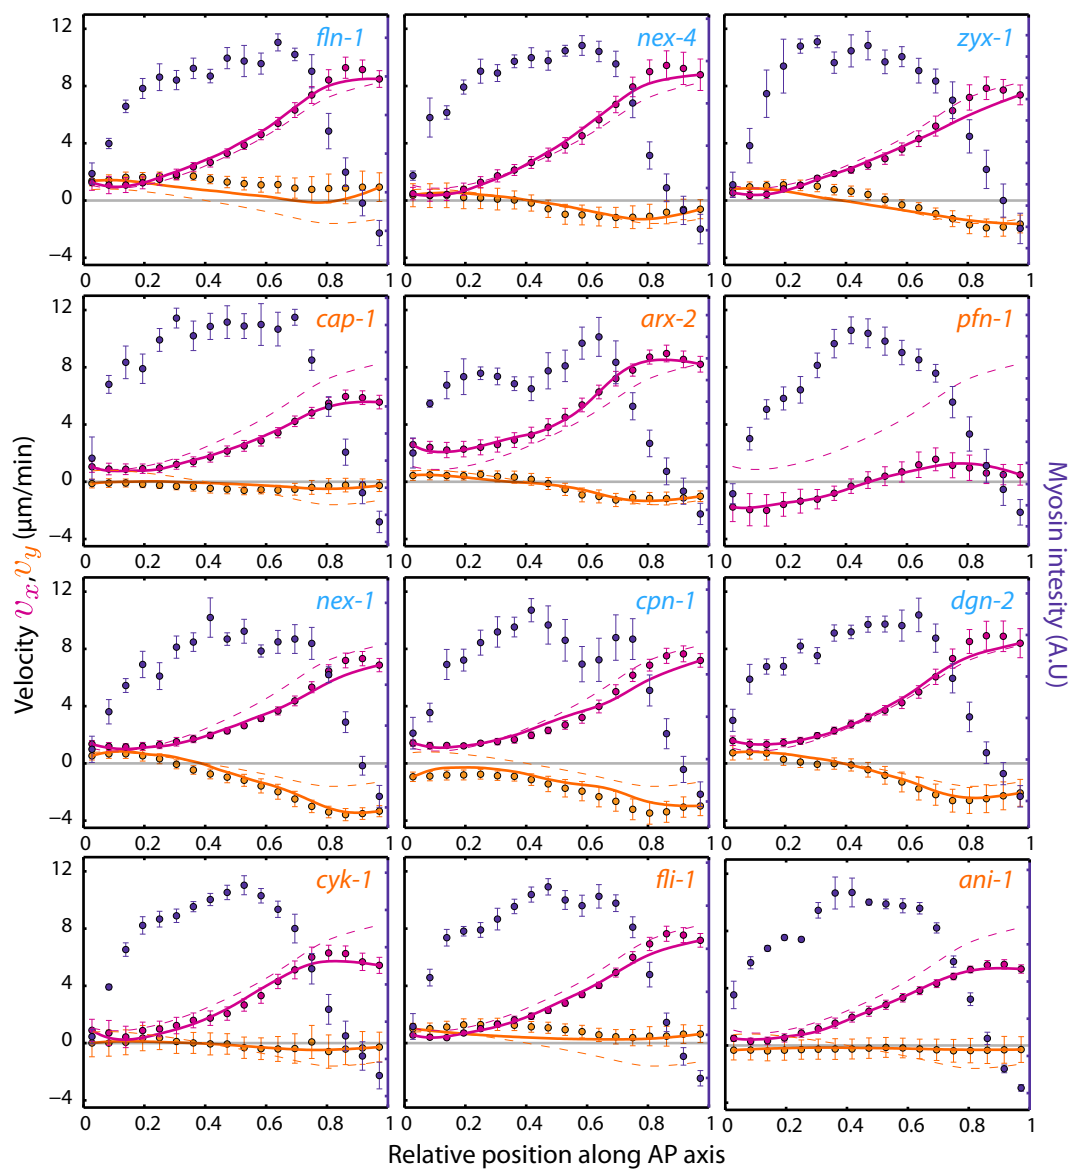

Supplement: supp [file elife-37677-supp-v1.zip]

non-RNAi

*unc-60* (RNAi)

*cap-1* (RNAi)

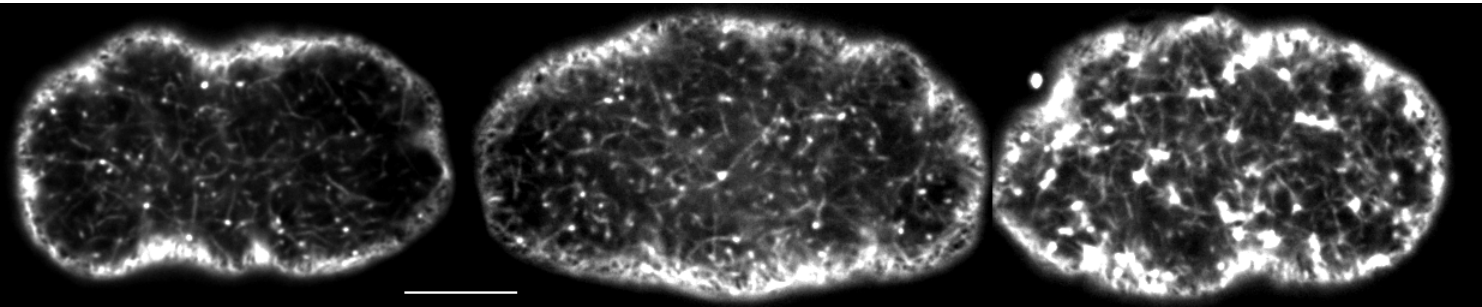

Supplement: supp [file elife-37677-supp-v1.zip]

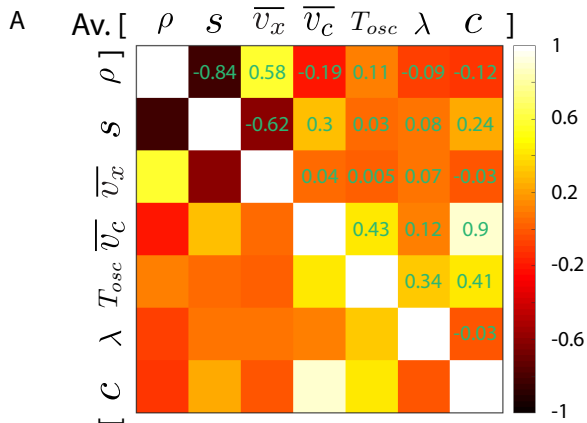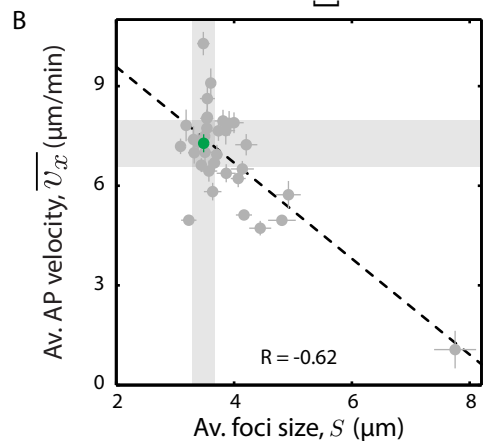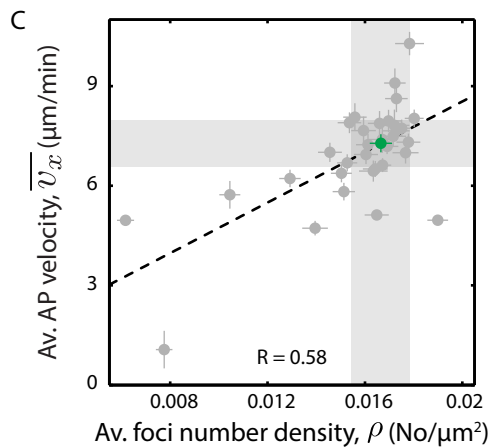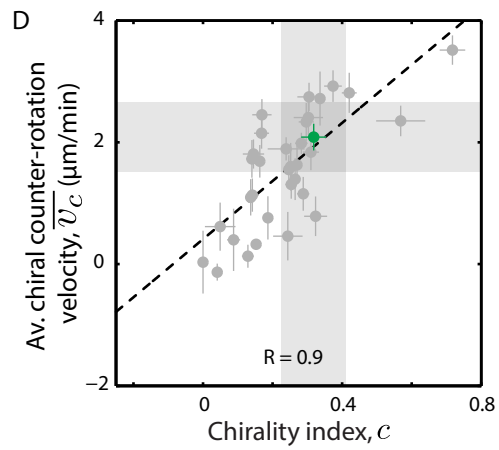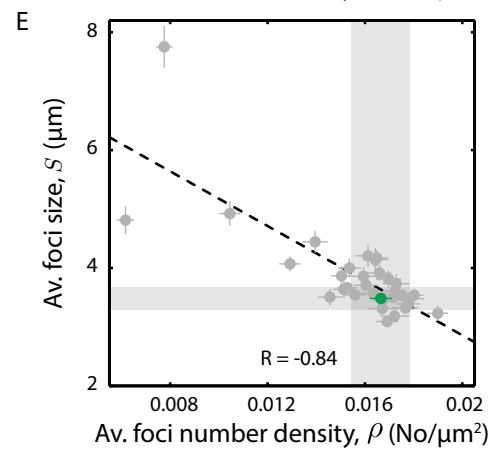

Supplement: supp [file elife-37677-supp-v1.zip]

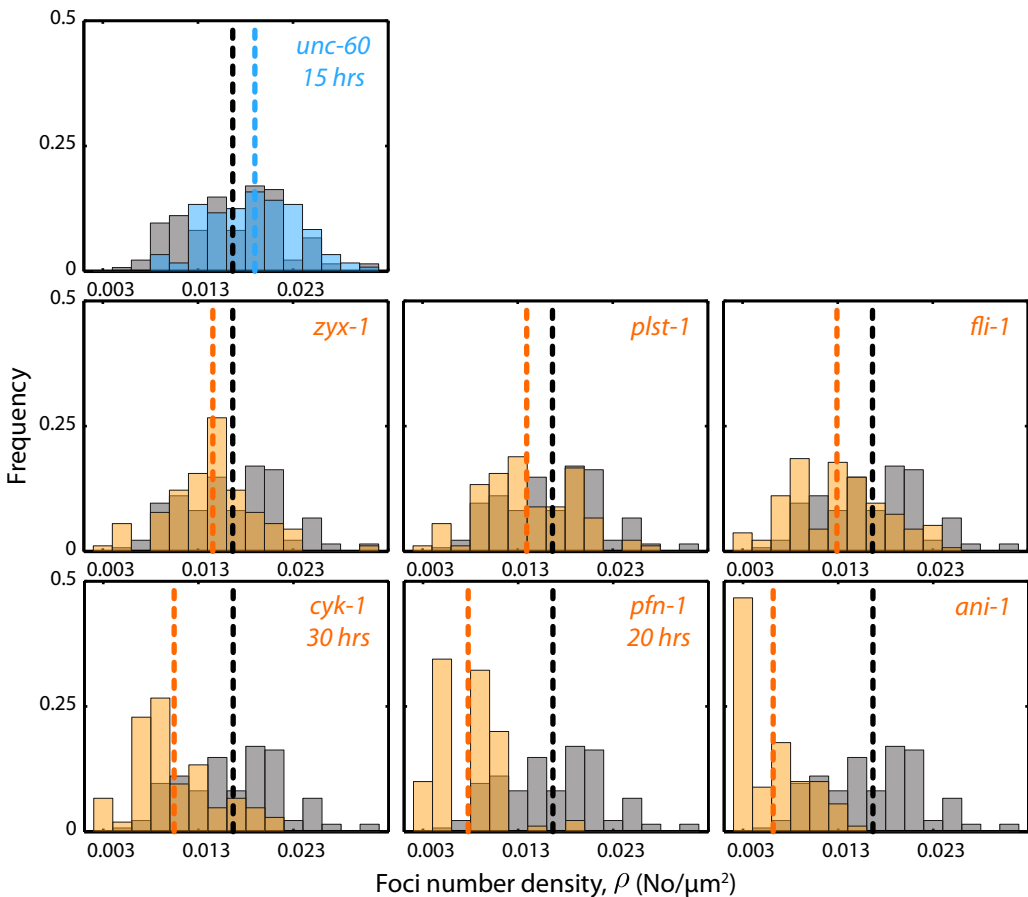

Supplement: supp [file elife-37677-supp-v1.zip]

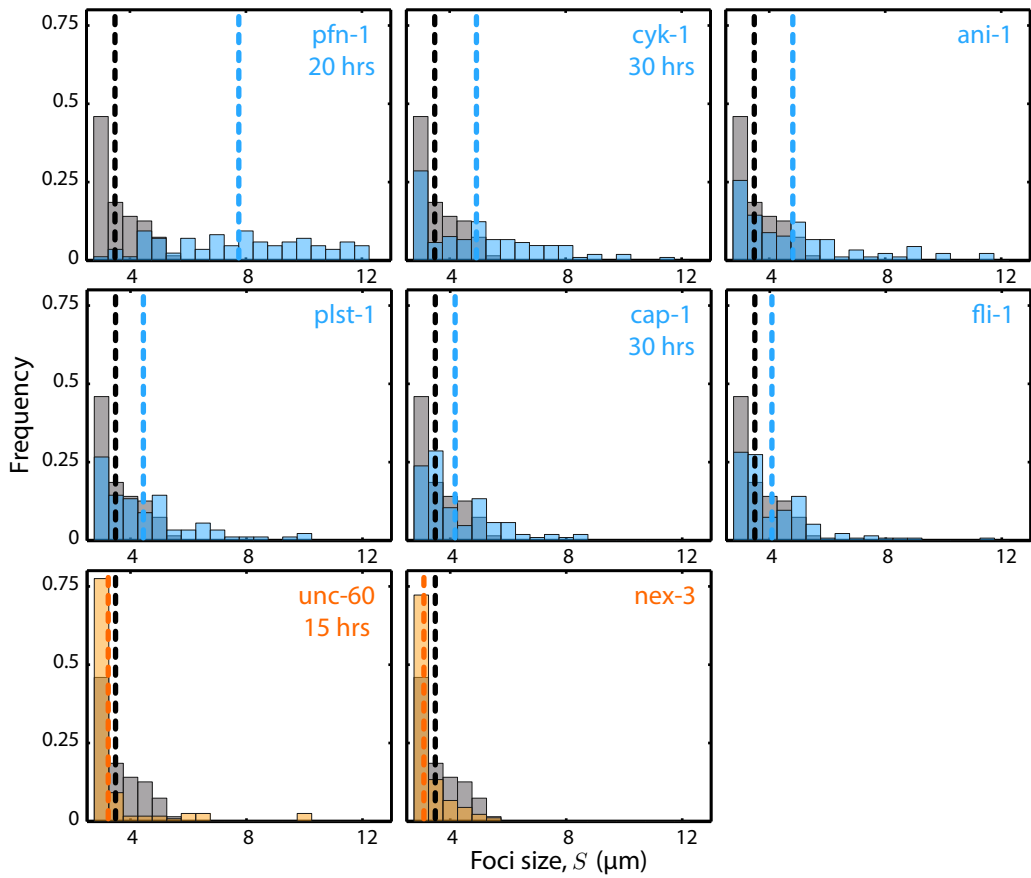

Supplement: supp [file elife-37677-supp-v1.zip]

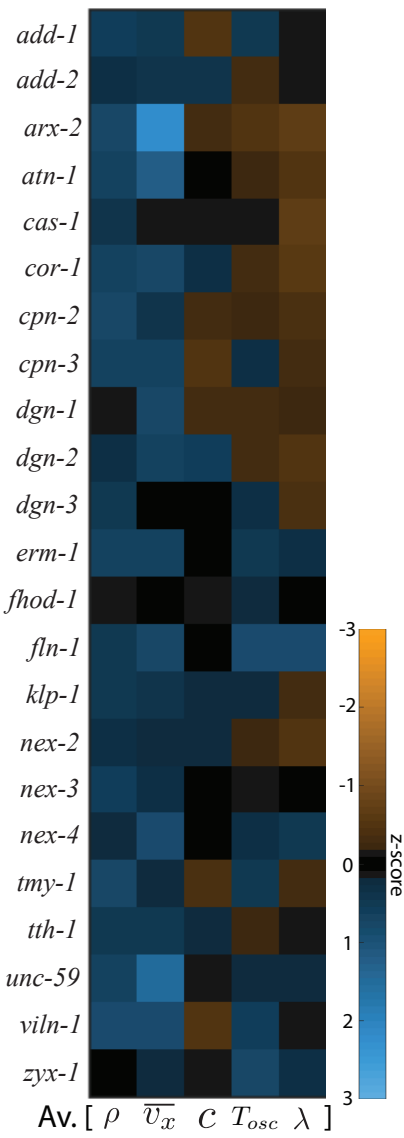

Supplement: supp [file elife-37677-supp-v1.zip]
